# Supplementary material
Source: HighWire-hosted journal article supplement (https://www.jpn.ca/highwire/filestream/89354/field_highwire_adjunct_files/0/jpn-180245-1-at.pdf)
Supplement: jpn-180245-1-at.pdf [file jpn-180245-1-at.pdf]

**Appendix 1** to Gong J, Wang J, Luo X, et al. Abnormalities of intrinsic regional brain activity in first-episode and chronic schizophrenia: a meta-analysis of resting-state functional MRI. *J Psychiatry Neurosci* 2019.

DOI: 10.1503/jpn.180245

Copyright © 2019 The Author(s) or their employer(s). To receive this resource in an accessible format, please contact us at [cmajgroup@cmaj.ca](mailto:cmajgroup@cmaj.ca).

*Online appendices are unedited and posted as supplied by the authors.*

**Abnormalities of intrinsic regional brain activity in first episode and chronic schizophrenia: a meta-analysis of resting-state functional MRI**  
Supplementary materials

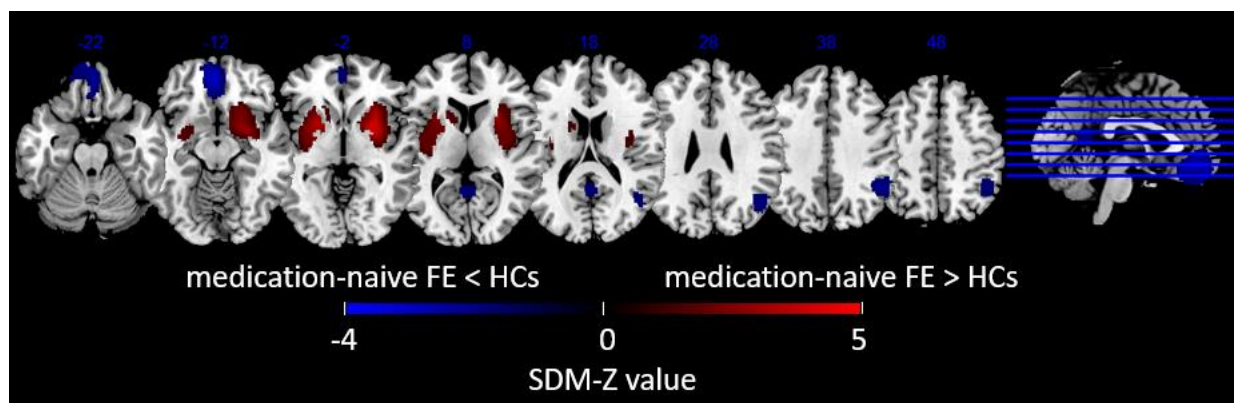

**Figure S1. Alterations in ALFF in medication-naive FE patients with SZ compared to HCs.** Areas with decreased ALFF relative to controls are displayed in blue, and areas with increased ALFF are displayed in red. The color bar indicates the maximum and the minimum SDM-Z values.

Abbreviations: FE = first episode; SZ = schizophrenia; HCs = healthy controls; ALFF = amplitude of low-frequency fluctuations; SDM = seed-based d mapping.

**Appendix 1** to Gong J, Wang J, Luo X, et al. Abnormalities of intrinsic regional brain activity in first-episode and chronic schizophrenia: a meta-analysis of resting-state functional MRI. *J Psychiatry Neurosci* 2019.

DOI: 10.1503/jpn.180245

*Online appendices are unedited and posted as supplied by the authors.*

---

**Table S1 Quality assessment checklist (score 0/0.5/1 per item; total score out of 10)\***

---

Category 1: Participants

1. Patients were evaluated prospectively, specific diagnostic criteria were applied, and demographic data were reported.
2. Healthy comparison participants were evaluated prospectively, psychiatric and medical illnesses were excluded.
3. Important variables (e.g., age, sex, illness duration, onset, medication status, comorbidity, severity of illness) were checked either by stratification or statistically.
4. Sample size per group > 10.

Category 2: Methods for image acquisition and analysis

5. Whole brain analysis was automated with no a priori regional selection.
  6. Coordinates reported in a standard space.
  7. The imaging technique used was clearly described so that it could be reproduced.
-

**Appendix 1** to Gong J, Wang J, Luo X, et al. Abnormalities of intrinsic regional brain activity in first-episode and chronic schizophrenia: a meta-analysis of resting-state functional MRI. *J Psychiatry Neurosci* 2019.

DOI: 10.1503/jpn.180245

*Online appendices are unedited and posted as supplied by the authors.*

---

8. Measurements were clearly described so that they could be reproduced.

Category 3: Results and conclusions

9. Statistical parameters for significant and important nonsignificant differences were provided.

10. Conclusions were consistent with the results obtained and the limitations were discussed.

\*When criteria were partially met, 0.5 points were awarded.

---

**Appendix 1** to Gong J, Wang J, Luo X, et al. Abnormalities of intrinsic regional brain activity in first-episode and chronic schizophrenia: a meta-analysis of resting-state functional MRI. *J Psychiatry Neurosci* 2019.

DOI: 10.1503/jpn.180245

*Online appendices are unedited and posted as supplied by the authors.*

**Table S2. Clusters of ALFF differences in medication-naive FE patients with SZ**

|              | Cluster | Anatomical label               | Peak MNI coordinate (x, y, z) | No. of voxels | SDM-Z value | <i>p</i> value         |
|--------------|---------|--------------------------------|-------------------------------|---------------|-------------|------------------------|
| FE > control | 1       | Right putamen                  | 26, 6, -4                     | 2749          | 5.148       | $< 1.0 \times 10^{-6}$ |
|              | 2       | Left putamen                   | -22, 8, 2                     | 1870          | 4.451       | $< 1.0 \times 10^{-6}$ |
| FE < control | 3       | Left mPFC, BA 11               | -2, 48, -12                   | 1551          | -3.191      | $< 1.0 \times 10^{-6}$ |
|              | 4       | Right angular gyrus/IPG, BA 39 | 48, -60, 26                   | 853           | -2.107      | 0.000253               |
|              | 5       | Right precuneus                | 4, -54, 16                    | 281           | -2.072      | 0.000304               |

Abbreviations: ALFF = amplitude of low-frequency fluctuations; FE = first episode; SZ = schizophrenia; BA = Brodmann area; MNI = Montreal neurological institute; SDM = seed-based d mapping; mPFC = medial prefrontal cortex.

**Appendix 1** to Gong J, Wang J, Luo X, et al. Abnormalities of intrinsic regional brain activity in first-episode and chronic schizophrenia: a meta-analysis of resting-state functional MRI. *J Psychiatry Neurosci* 2019.

DOI: 10.1503/jpn.180245

*Online appendices are unedited and posted as supplied by the authors.*

**Table S3. Heterogeneity of ALFF alterations in FE, chronic patients with SZ, and total patients with SZ**

| Anatomical label              | Peak MNI coordinate (x, y, z) | No. of voxels | SDM-Z value | Heterogeneity | p value                  |
|-------------------------------|-------------------------------|---------------|-------------|---------------|--------------------------|
| <b>Total patients with SZ</b> |                               |               |             |               |                          |
| Left putamen                  | -26, -2, 8                    | 491           | 3.906       | No            | < 1.0 x 10 <sup>-6</sup> |
| Right precentral gyrus, BA 6  | 52, -8, 42                    | 307           | 1.792       | No            | 0.000470                 |
| Right ITG, BA 20              | 60, -34, -18                  | 182           | 2.208       | No            | 0.000201                 |
| Right putamen                 | 28, -2, 12                    | 150           | 2.393       | Yes           | 0.000134                 |
| Left gyrus rectus, BA 11      | -8, 50, -20                   | 131           | 2.148       | No            | 0.000248                 |
| Right ACC                     | 14, 14, 4                     | 92            | 1.672       | Yes           | 0.000635                 |
| Left MOG, BA 19               | -36, -84, -2                  | 67            | 1.604       | No            | 0.000717                 |
| Left MTG, BA 21               | -54, 0, -30                   | 30            | 1.195       | No            | 0.001646                 |
| Left SFG, BA 10               | -18, 66, 4                    | 29            | 1.141       | No            | 0.001806                 |
| Right SOG, BA 19              | 26, -84, 32                   | 30            | 1.274       | Yes           | 0.001388                 |
| <b>FE patients with SZ</b>    |                               |               |             |               |                          |
| Left gyrus rectus, BA 11      | -8, 50, -20                   | 327           | 3.152       | No            | 0.000031                 |
| Left putamen                  | -24, 0, 8                     | 243           | 3.985       | Yes           | < 1.0 x 10 <sup>-6</sup> |
| Right putamen                 | 26, 0, 10                     | 249           | 3.321       | Yes           | 0.000026                 |
| Right putamen                 | 20, 14, -6                    | 99            | 1.841       | Yes           | 0.000981                 |
| Right IPG, BA 40              | 44, -54, 50                   | 41            | 1.536       | Yes           | 0.001780                 |

**Appendix 1** to Gong J, Wang J, Luo X, et al. Abnormalities of intrinsic regional brain activity in first-episode and chronic schizophrenia: a meta-analysis of resting-state functional MRI. *J Psychiatry Neurosci* 2019.

DOI: 10.1503/jpn.180245

*Online appendices are unedited and posted as supplied by the authors.*

|                                 |              |     |       |     |          |
|---------------------------------|--------------|-----|-------|-----|----------|
| Left MFG, BA 8                  | -24, 8, 58   | 29  | 1.660 | No  | 0.001373 |
| Right precuneus                 | 8, -46, 40   | 16  | 1.574 | Yes | 0.001672 |
| <b>Chronic patients with SZ</b> |              |     |       |     |          |
| Right ITG, BA 20                | 60, -34, -18 | 273 | 3.870 | No  | 0.000062 |
| Right caudate                   | 14, 14, 4    | 121 | 3.201 | No  | 0.000299 |
| Left MTG, BA 21                 | -54, 0, -28  | 87  | 2.995 | No  | 0.000470 |
| Left MOG, BA 19                 | -36, -84, 0  | 60  | 3.006 | No  | 0.000459 |
| Left SFG, BA 10                 | -18, 66, 4   | 62  | 2.798 | Yes | 0.000748 |
| Right SOG, BA 19                | 28, -84, 32  | 25  | 2.632 | Yes | 0.001182 |
| Left heschl gyrus, BA 48        | -42, -18, 6  | 20  | 2.000 | No  | 0.004278 |
| Left IPG, BA 39                 | -56, -56, 36 | 19  | 2.178 | No  | 0.003076 |
| Right IFG, triangular part      | 48, 42, 0    | 12  | 2.115 | Yes | 0.003416 |
| Left precuneus, BA 7            | -8, -62, 66  | 10  | 2.073 | Yes | 0.003762 |

Abbreviations: ALFF = amplitude of low-frequency fluctuations; FE = first episode; SZ = schizophrenia; BA = Brodmann area; No. = number; MNI = Montreal neurological institute; SDM = seed-based d mapping; MFG = middle frontal gyrus; ITG = inferior temporal gyrus; MTG = middle temporal gyrus; MOG = middle occipital gyrus; SFG = superior frontal gyrus; SOG = superior occipital gyrus; IPG = inferior parietal gyri; IFG = inferior frontal gyrus; ACC = anterior cingulate cortex.

**Appendix 1** to Gong J, Wang J, Luo X, et al. Abnormalities of intrinsic regional brain activity in first-episode and chronic schizophrenia: a meta-analysis of resting-state functional MRI. *J Psychiatry Neurosci* 2019.

DOI: 10.1503/jpn.180245

Online appendices are unedited and posted as supplied by the authors.

**Table S4 Meta-regression analyses: factors affecting ALFF in studies of patients with SZ**

|                                                |       | Anatomical label                                                            | Peak MNI coordinate<br>(x, y, z) | No. of voxels | SDM-Z value | p value                  |
|------------------------------------------------|-------|-----------------------------------------------------------------------------|----------------------------------|---------------|-------------|--------------------------|
| <b>Total patients with SZ</b>                  |       |                                                                             |                                  |               |             |                          |
| Effects of<br>positive score                   | PANSS | ALFF alterations in studies with higher PANSS positive score                |                                  |               |             |                          |
|                                                |       | Left precuneus, BA 7                                                        | -10, -64, 68                     | 18            | -4.068      | 0.000041                 |
|                                                |       | Right precuneus, BA 29                                                      | 4, -42, 6                        | 86            | 4.934       | 0.000015                 |
| Effects of<br>negative score                   | PANSS | ALFF alterations in studies with higher PANSS negative score                |                                  |               |             |                          |
|                                                |       | Left precuneus, BA 7                                                        | -10, -64, 68                     | 18            | -4.417      | 0.000046                 |
|                                                |       | Right precuneus, BA 29                                                      | 4, -42, 6                        | 59            | 5.169       | < 1.0 x 10 <sup>-6</sup> |
| Effects of<br>general psychopathology<br>score | PANSS | ALFF alterations in studies with higher PANSS general psychopathology score |                                  |               |             |                          |
|                                                |       | Right putamen                                                               | 32, 0, 4                         | 364           | 3.548       | < 1.0 x 10 <sup>-6</sup> |
|                                                |       | Right IFG, BA 45                                                            | 48, 40, -4                       | 380           | -3.458      | 0.000015                 |
|                                                |       | Right IFG, BA 48                                                            | 52, 16, 20                       | 73            | -2.847      | 0.000134                 |
|                                                |       | Right ACC, BA 32                                                            | 8, 42, 26                        | 46            | -2.834      | 0.000144                 |
|                                                |       | Left ITG, BA20                                                              | -50, -24, -24                    | 38            | -2.663      | 0.000299                 |

**Appendix 1** to Gong J, Wang J, Luo X, et al. Abnormalities of intrinsic regional brain activity in first-episode and chronic schizophrenia: a meta-analysis of resting-state functional MRI. *J Psychiatry Neurosci* 2019.

DOI: 10.1503/jpn.180245

*Online appendices are unedited and posted as supplied by the authors.*

---

**FE patients with SZ**

---

|                                          |       |                                                                             |             |     |        |                          |
|------------------------------------------|-------|-----------------------------------------------------------------------------|-------------|-----|--------|--------------------------|
| Effects of positive score                | PANSS | ALFF alterations in studies with higher PANSS positive score                |             |     |        |                          |
|                                          |       | Right IPG, BA 40                                                            | 44, -54, 50 | 218 | 3.848  | < 1.0 x 10 <sup>-6</sup> |
|                                          |       | Right precuneus                                                             | 6, -54, 14  | 116 | 3.740  | < 1.0 x 10 <sup>-6</sup> |
|                                          |       | Left mPFC                                                                   | -24, 10, 58 | 29  | 3.113  | 0.000062                 |
| Effects of negative score                | PANSS | ALFF alterations in studies with higher PANSS negative score                |             |     |        |                          |
|                                          |       | Right putamen                                                               | 22, 14, -10 | 13  | -2.685 | 0.000222                 |
| Effects of general psychopathology score | PANSS | ALFF alterations in studies with higher PANSS general psychopathology score |             |     |        |                          |
|                                          |       | None                                                                        |             |     |        |                          |

---

**Chronic patients with SZ**

---

|                                          |       |                                                                             |              |    |        |                          |
|------------------------------------------|-------|-----------------------------------------------------------------------------|--------------|----|--------|--------------------------|
| Effects of positive score                | PANSS | ALFF alterations in studies with higher PANSS positive score                |              |    |        |                          |
|                                          |       | Left SFG, BA 10                                                             | -18, 64, 4   | 29 | 5.226  | < 1.0 x 10 <sup>-6</sup> |
|                                          |       | Left precuneus, BA 7                                                        | -10, -64, 68 | 19 | -4.804 | 0.000005                 |
| Effects of negative score                | PANSS | ALFF alterations in studies with higher PANSS negative score                |              |    |        |                          |
|                                          |       | Left precuneus, BA 7                                                        | -10, -64, 68 | 18 | -4.674 | 0.000015                 |
| Effects of general psychopathology score | PANSS | ALFF alterations in studies with higher PANSS general psychopathology score |              |    |        |                          |



**Appendix 1** to Gong J, Wang J, Luo X, et al. Abnormalities of intrinsic regional brain activity in first-episode and chronic schizophrenia: a meta-analysis of resting-state functional MRI. *J Psychiatry Neurosci* 2019.

DOI: 10.1503/jpn.180245

*Online appendices are unedited and posted as supplied by the authors.*

general psychopathology  
score

|                  |               |     |        |          |
|------------------|---------------|-----|--------|----------|
| Right ACC, BA 32 | 8, 42, 26     | 181 | -3.282 | 0.000046 |
| Left ITG, BA 20  | -50, -26, -24 | 172 | -3.067 | 0.000077 |
| Right IFG, BA 47 | 44, 36, -6    | 73  | -2.744 | 0.000144 |

---

Abbreviations: ALFF = amplitude of low-frequency fluctuations; FE = first episode; SZ = schizophrenia; BA = Brodmann area; MNI = Montreal neurological institute; SDM = seed-based d mapping; PANSS = Positive and Negative Syndrome Scale; IFG = inferior frontal gyrus; ACC = anterior cingulate cortex; ITG = inferior temporal gyrus; IPG = inferior parietal gyri; mPFC = medial prefrontal cortex; SFG = superior frontal gyrus.

**Appendix 1** to Gong J, Wang J, Luo X, et al. Abnormalities of intrinsic regional brain activity in first-episode and chronic schizophrenia: a meta-analysis of resting-state functional MRI. *J Psychiatry Neurosci* 2019.

DOI: 10.1503/jpn.180245

Online appendices are unedited and posted as supplied by the authors.

**Table S5. Clusters of ALFF differences between FE and chronic patients with SZ compared to controls.**

| Cluster      | Anatomical label             | Brain network | Peak MNI coordinate (x, y, z) | No. of voxels | SDM-Z value | p value            |
|--------------|------------------------------|---------------|-------------------------------|---------------|-------------|--------------------|
| FE > Chronic |                              |               |                               |               |             |                    |
| 1            | Left postcentral gyrus, BA 4 | SMN           | -52, -12, 38                  | 1036          | 2.903       | 0.000036           |
| 2            | Left precuneus, BA 7         | DMN           | -6, -58, 62                   | 717           | 3.620       | < 10 <sup>-6</sup> |
| 3            | Right precentral gyrus, BA 4 | SMN           | 50, -14, 42                   | 479           | 2.056       | 0.001063           |
| 4            | Left putamen                 |               | -28, 0, 0                     | 132           | 1.860       | 0.002297           |
| 5            | Right putamen                |               | 28, 0, 4                      | 22            | 1.786       | 0.002921           |
| Chronic > FE |                              |               |                               |               |             |                    |
| 1            | Right PCC                    | DMN           | 4, -46, 10                    | 400           | -2.765      | 0.000268           |
| 2            | Left SFG, BA 10              |               | -18, 64, 4                    | 69            | -2.079      | 0.002369           |

Abbreviations: ALFF = amplitude of low-frequency fluctuations; FE = first episode; SZ = schizophrenia; BA = Brodmann area; MNI = Montreal neurological institute; SDM = seed-based d mapping; PCC = posterior cingulate cortex; SFG = superior frontal gyrus.

**Appendix 1** to Gong J, Wang J, Luo X, et al. Abnormalities of intrinsic regional brain activity in first-episode and chronic schizophrenia: a meta-analysis of resting-state functional MRI. *J Psychiatry Neurosci* 2019.

DOI: 10.1503/jpn.180245

*Online appendices are unedited and posted as supplied by the authors.*

**Table S6. Clusters of ALFF differences between chronic SZ patients and HCs after FDR correction ( $p < 0.05$ ).**

|               | Anatomical label              | Brain network | Peak coordinate (x, y, z) | MNI No. of voxels | SDM-Z value | $p$ value              | Egger's test ( $p$ value) | JK    |
|---------------|-------------------------------|---------------|---------------------------|-------------------|-------------|------------------------|---------------------------|-------|
| Chronic < HCs | Right postcentral gyrus, BA 4 | SMN           | 46, -20, 44               | 2517              | -5.160      | $< 1.0 \times 10^{-6}$ | 0.591                     | 15/15 |

Abbreviations: ALFF = amplitude of low-frequency fluctuations; SZ = schizophrenia; HCs = healthy controls; BA = Brodmann area; MNI = Montreal neurological institute; SDM = seed-based d mapping; JK = Jackknife sensitivity analysis; SMN = sensorimotor network.
